# Supplementary material for: Mapping subsea permafrost around Tuktoyaktuk Island (Northwest Territories, Canada) using electrical resistivity tomography
Source: Copernicus journal article supplement (doi:10.5194/tc-19-997-2025), 2025-03-06
Supplement: Supplementary file 1 [file tc-19-997-2025-supplement.pdf]

Supplement of The Cryosphere, 19, 997–1012, 2025  
<https://doi.org/10.5194/tc-19-997-2025-supplement>  
© Author(s) 2025. CC BY 4.0 License.

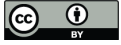

*Supplement of*

## **Mapping subsea permafrost around Tuktoyaktuk Island (Northwest Territories, Canada) using electrical resistivity tomography**

**Ephraim Erkens et al.**

*Correspondence to:* Ephraim Erkens (ephraimerkens@gmail.com)

The copyright of individual parts of the supplement might differ from the article licence.

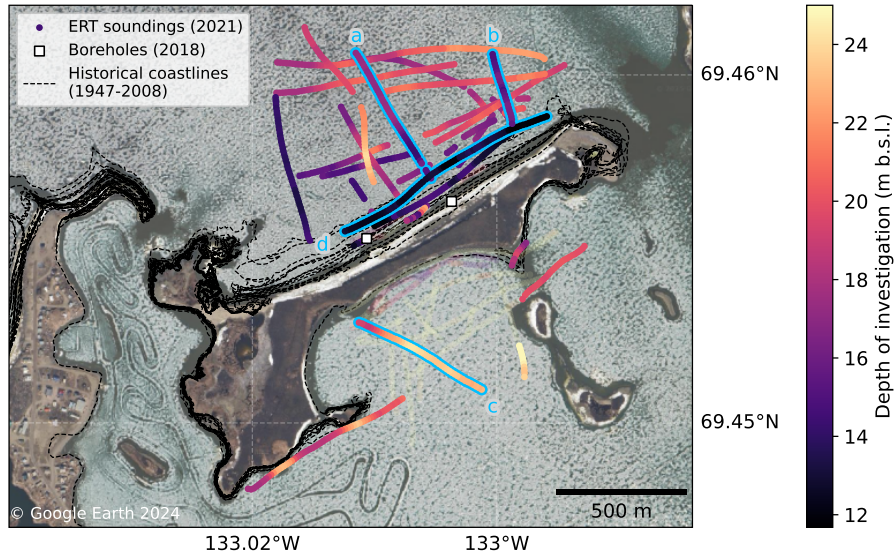

**Figure S1.** Map of the ERT surveys conducted around Tuktoyaktuk Island (analogous to Fig. 6a). The survey lines were color-coded with the depth of investigation (DOI) in meters below sea level (m b.s.l.). The DOI ranged from around 12 to around 25 m b.s.l. The DOI of profiles a, b and d on the northern side was shallower than in profile c on the southern side.
